Development 140, 1369 (2013) doi:10.1242/dev.087981  
© 2013. Published by The Company of Biologists Ltd

## Transcriptional priming of intrathymic precursors for dendritic cell development

**Amanda J. Moore, Janice Sarmiento, Mahmood Mohtashami, Marsela Braunstein, Juan-Carlos Zúñiga-Pflücker and Michele K. Anderson**

There was an error published in *Development* **139**, 373-384.

In the legend to Fig. 10, the authors incorrectly stated that donor cells were injected intrathymically rather than intravenously. The correct figure legend appears below.

**Fig. 10. Intrathymic DC development from ETP, DN1d and DN1e subsets following intravenous tail vein injections.** PBS, ETP, DN1d or DN1e CD45.2 donor cells were injected intravenously into nonirradiated CD45.1 recipient mice. Thymus sections were analyzed for the presence of donor-derived DCs (CD11c<sup>+</sup> CD45.2<sup>+</sup>) in proximity to medullary thymic epithelial cells (keratin 5<sup>+</sup>) 7 days following injection. Cells were stained with DAPI (blue) and for CD11c (green), CD45.2 (red), keratin-5 (purple). Images are representative of triplicate experiments. Arrowheads indicate donor-derived DCs.

The authors apologise to readers for this mistake.
